# Supplementary material for: Letter to the editor on a paper by Kaivola et al. (2020): carriership of two copies of C9orf72 hexanucleotide repeat intermediate-length alleles is not associated with amyotrophic lateral sclerosis or frontotemporal dementia
Source: PubMed Central journal article supplement (PMC9494883; doi:10.1186/s40478-022-01438-0), 2022-09-21
Supplement: 40478_2022_1438_MOESM2_ESM.pdf [file 40478_2022_1438_MOESM2_ESM.pdf]

# Supplementary material de Boer et al., 2022.

Raw PCR data examples of samples from cohort of Reus et al., 2021

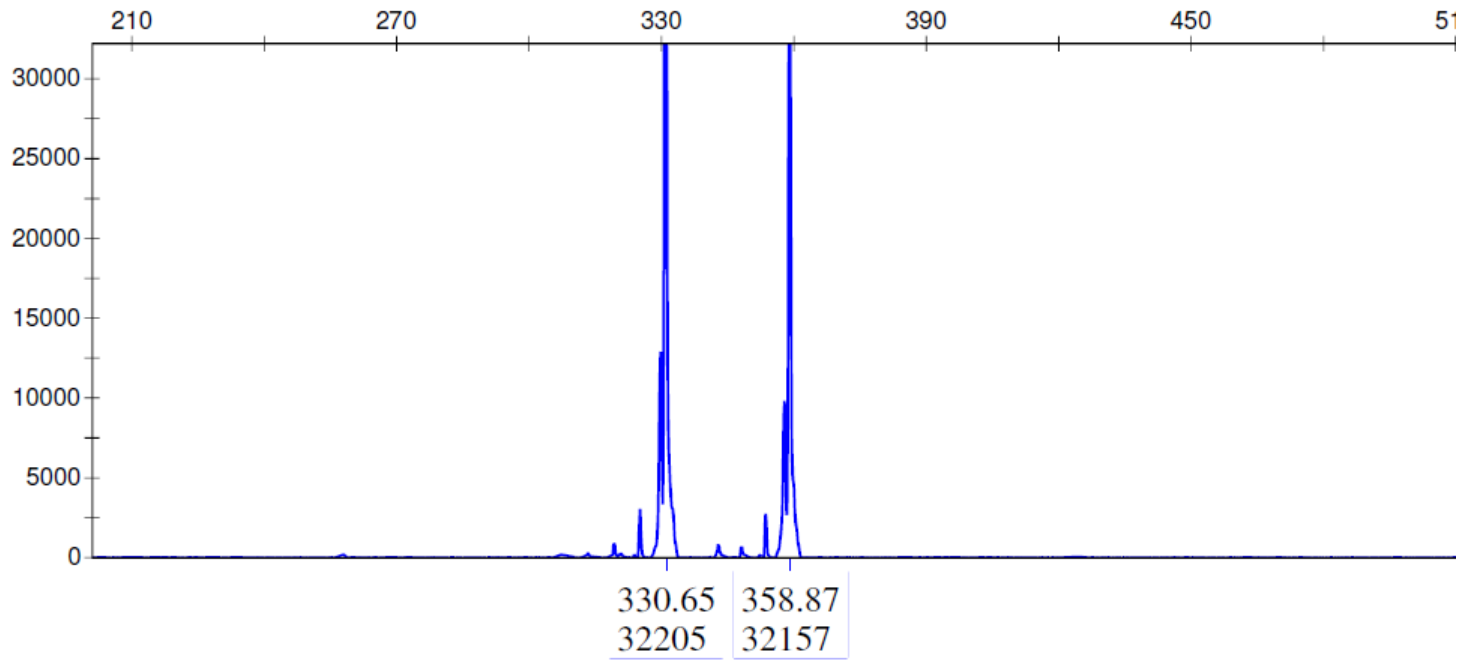

Repeat length 6 and 11

Explanation: 305 is repeat length of 2

$330 - 305 = 25 / 6 = 4$  repeat difference + 2 original = 6

$358 - 305 = 53 / 6 = 9$  repeat difference + 2 original = 11

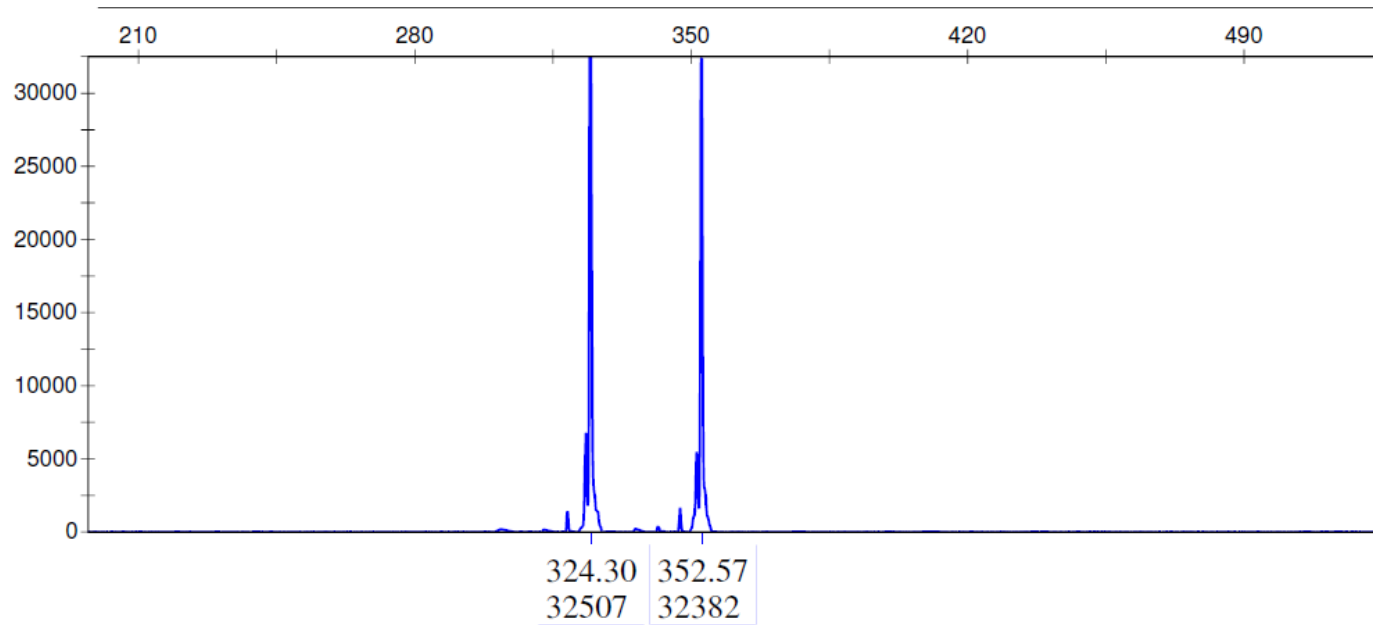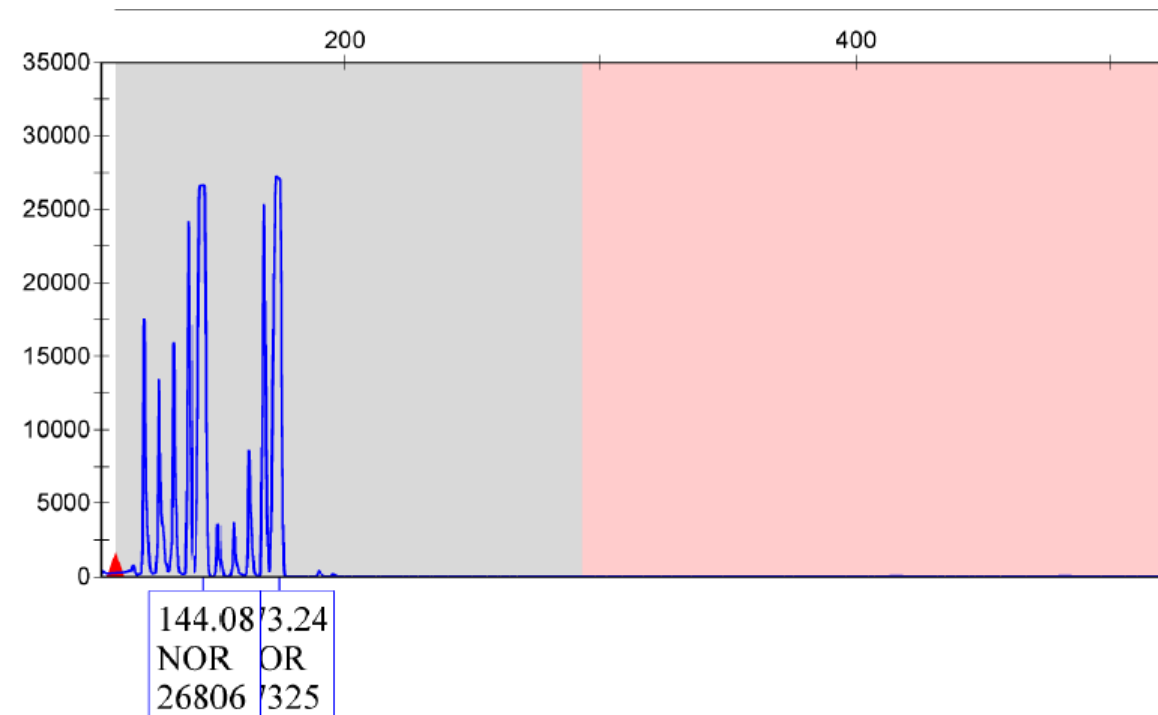

Repeat length 5 and 10, confirmed with Asuragen

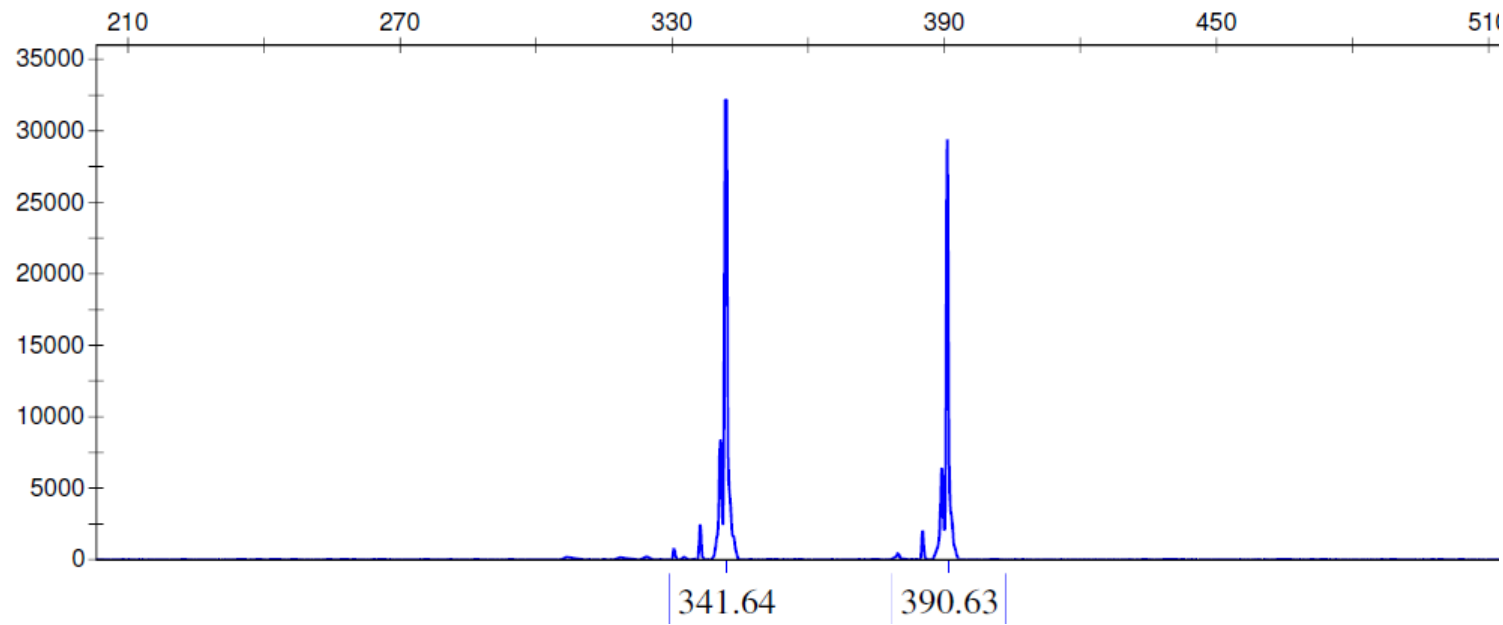

Repeat length 8 and 16

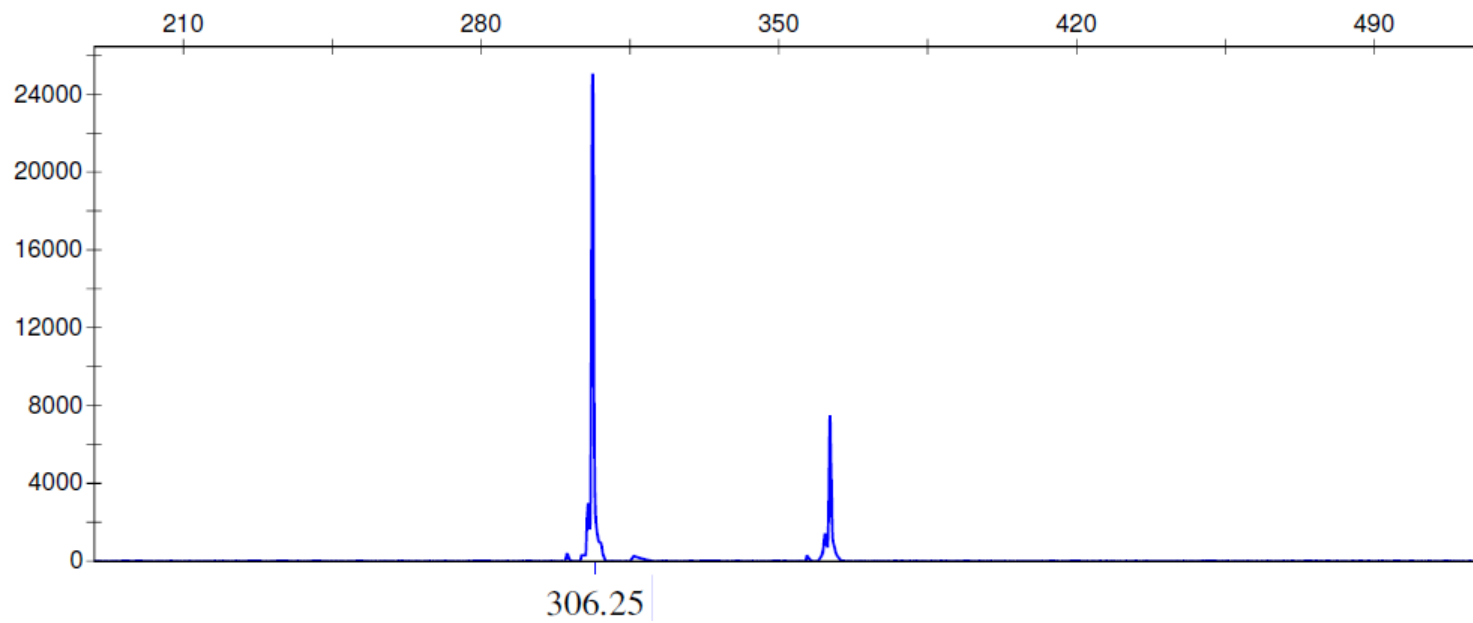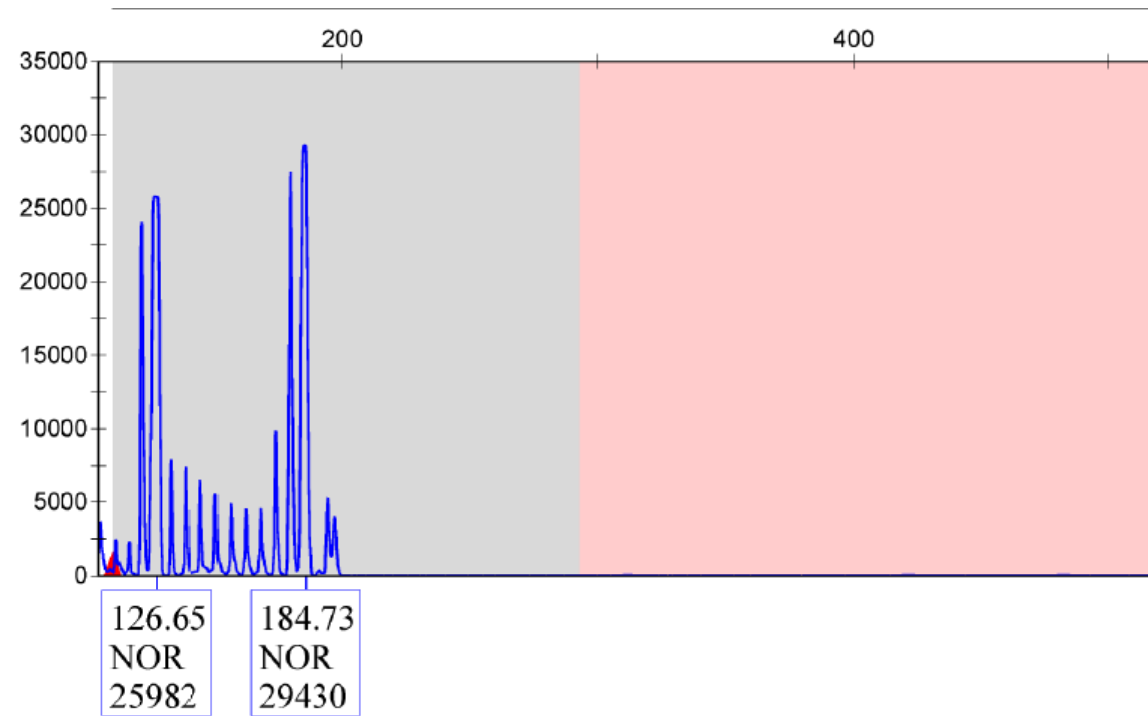

Repeat length 2 and 12, confirmed with Asuragen

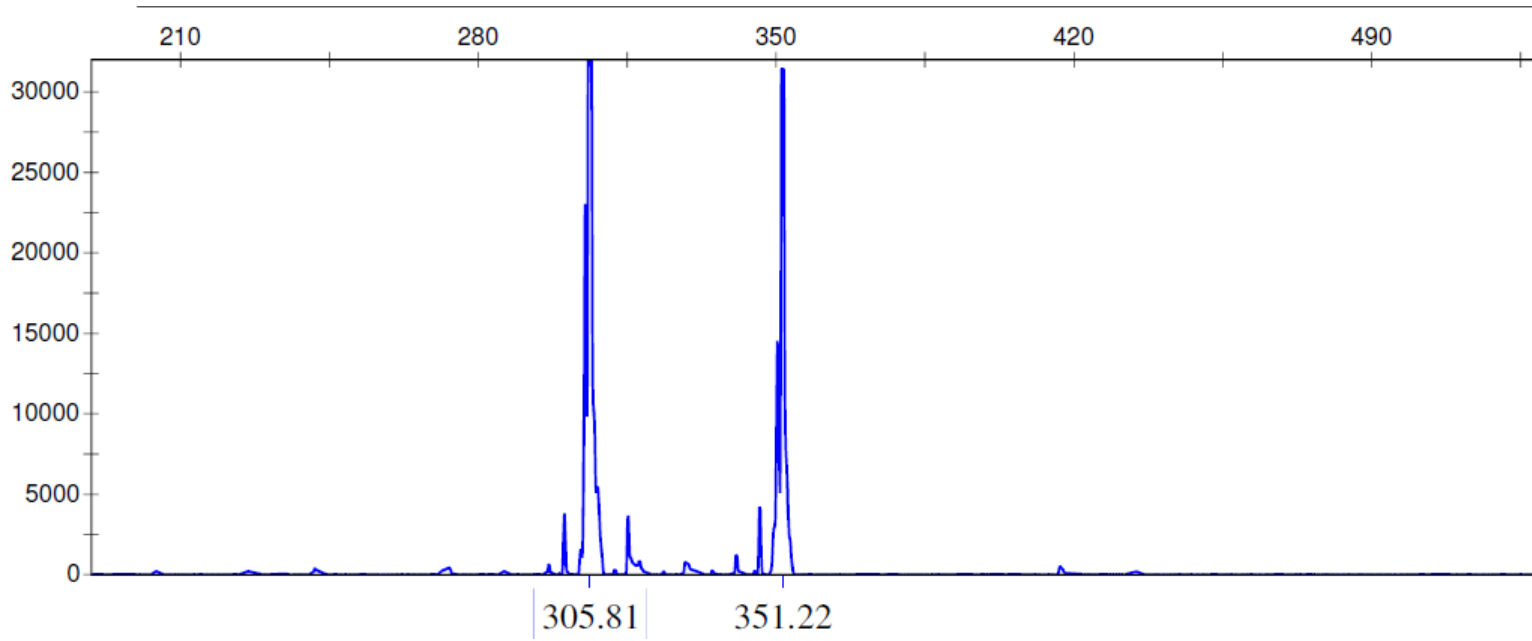

Repeat length 2 and 10

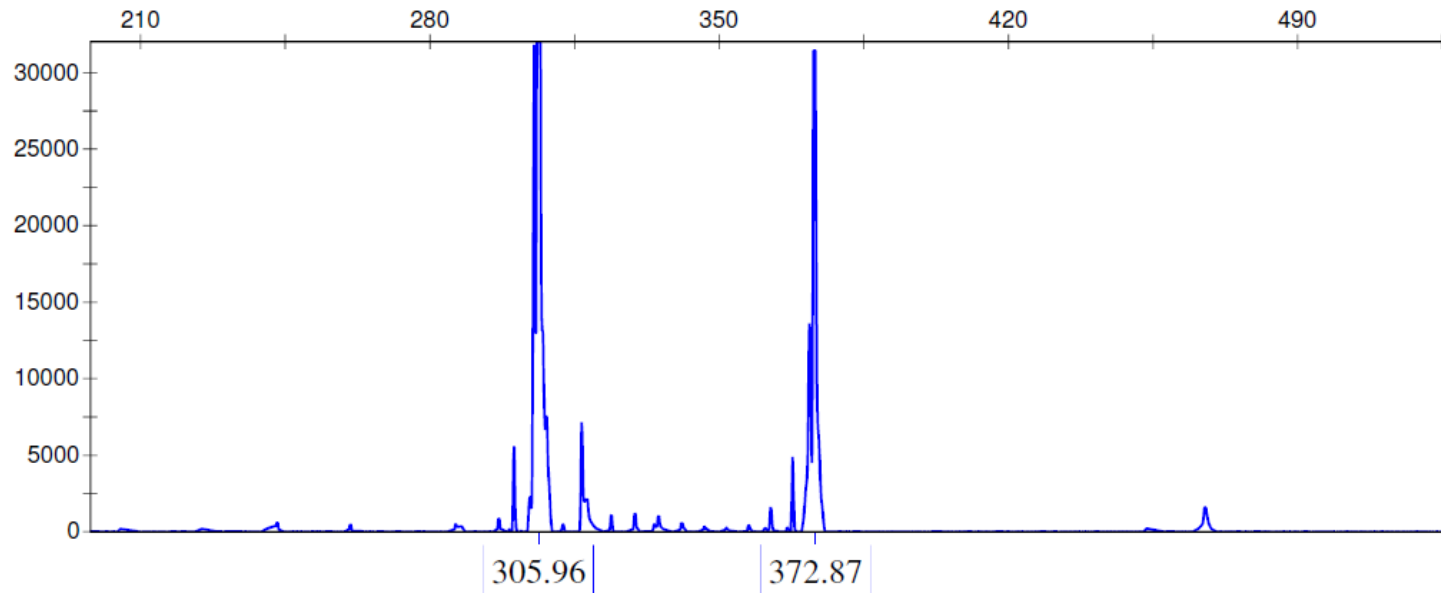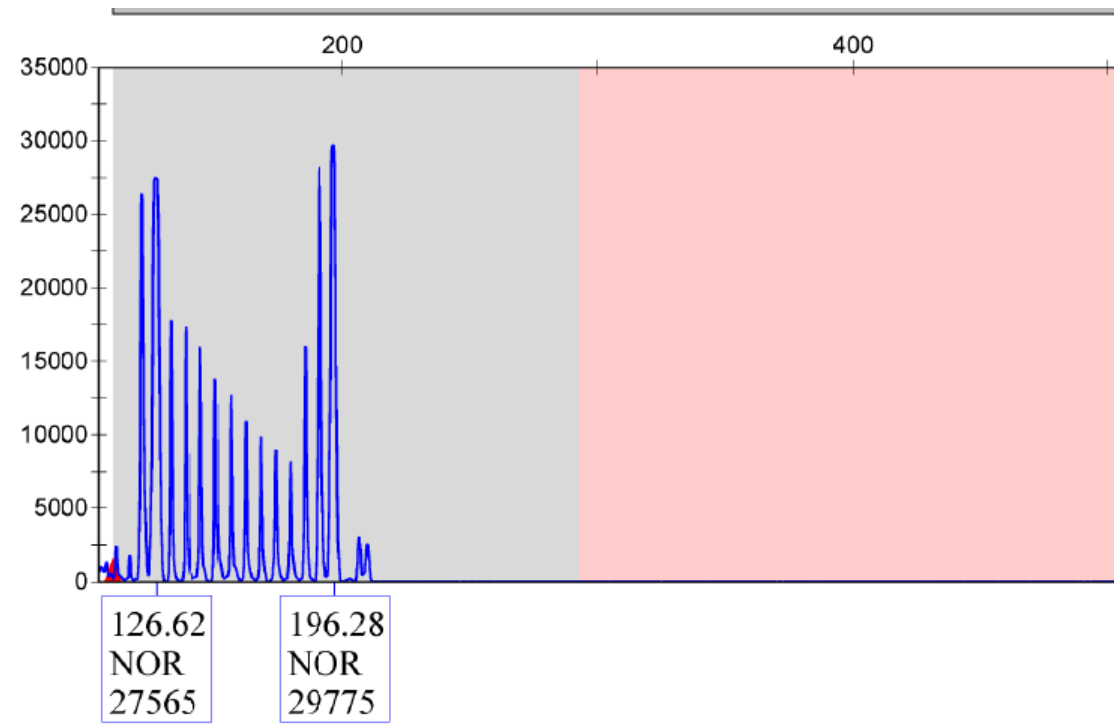

Repeat length 2 and 13, confirmed with Asuragen

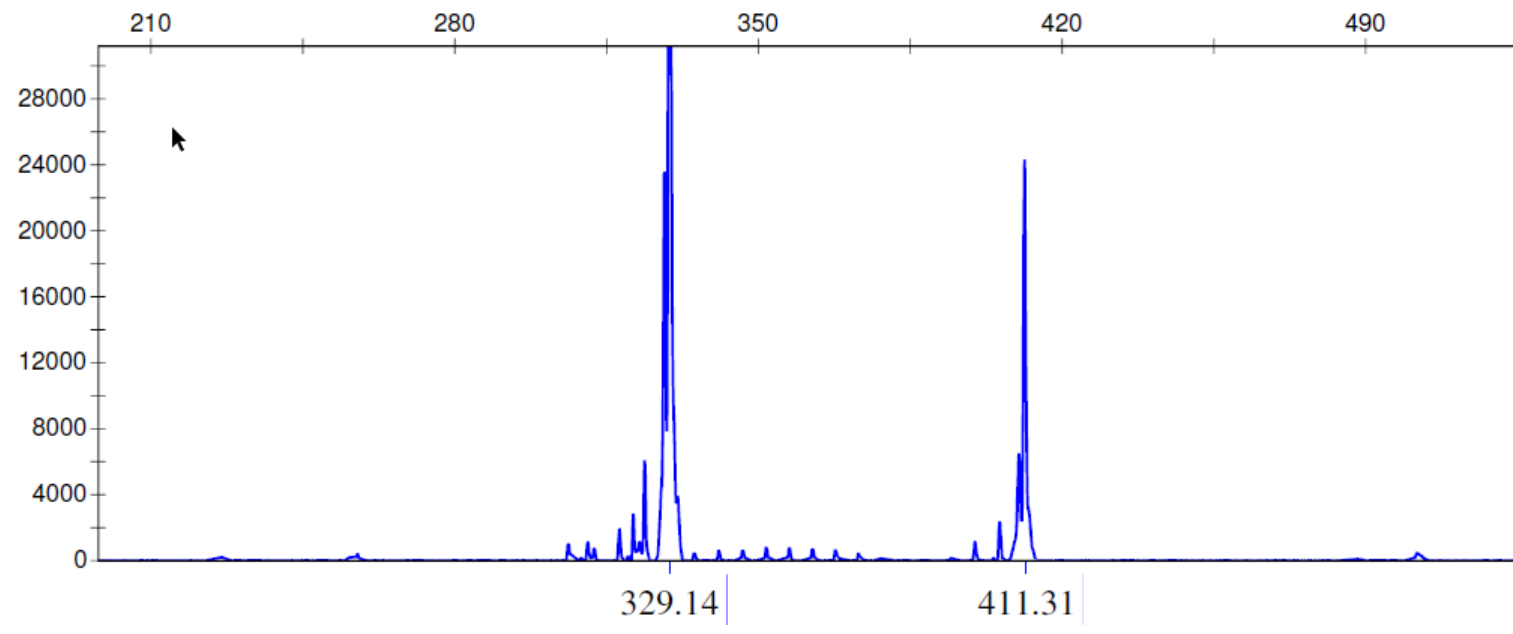

Repeat length 6 and 20

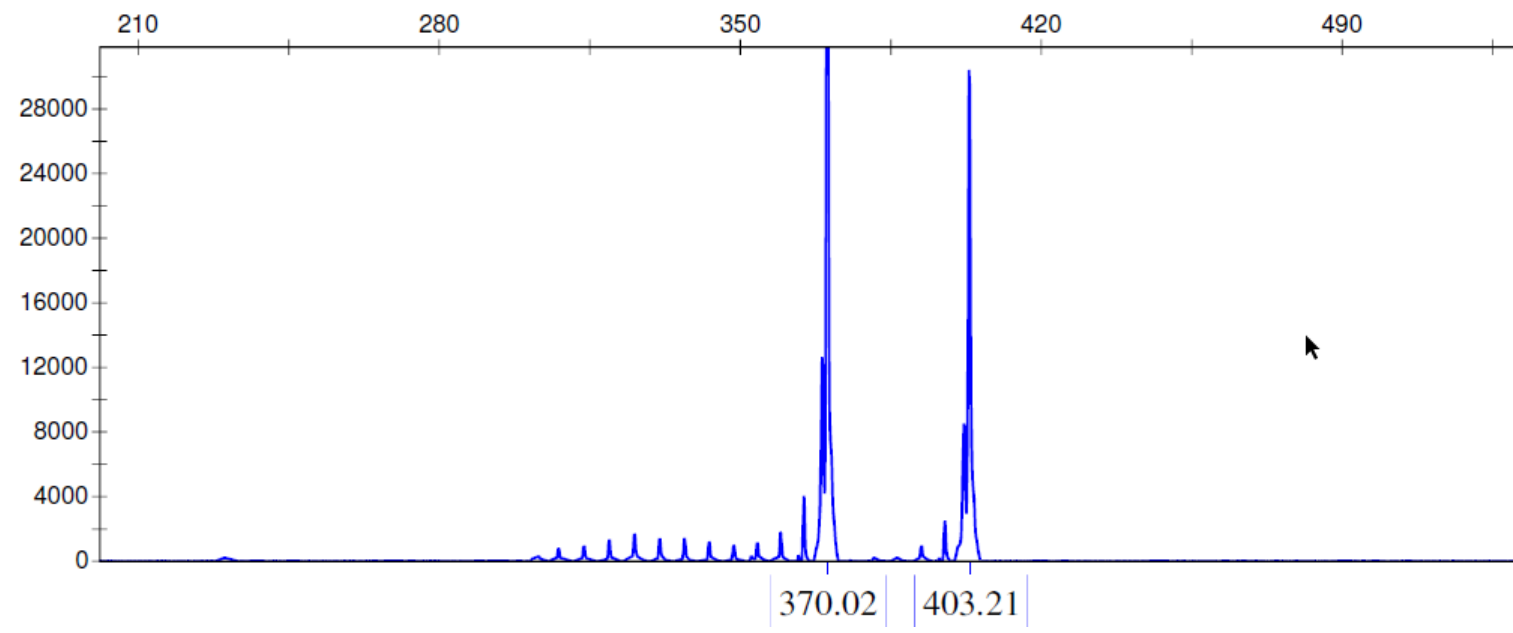

Repeat length 13 and 18

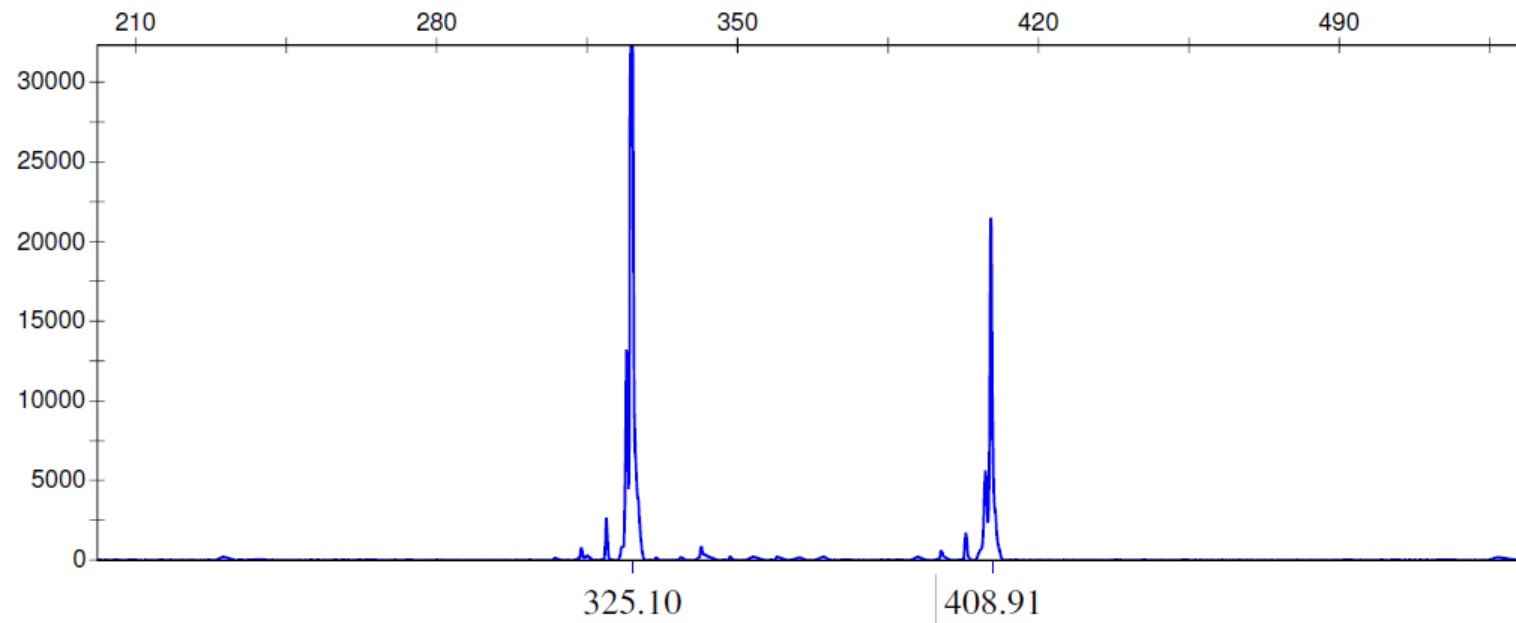

Repeat length 5 and 19

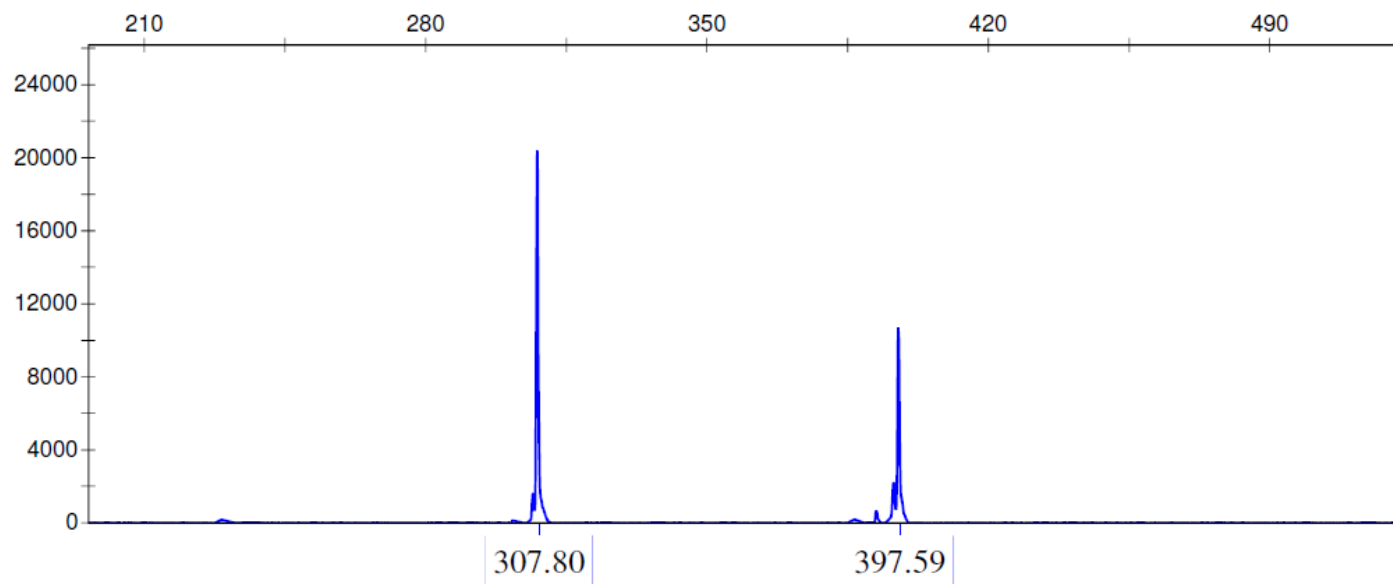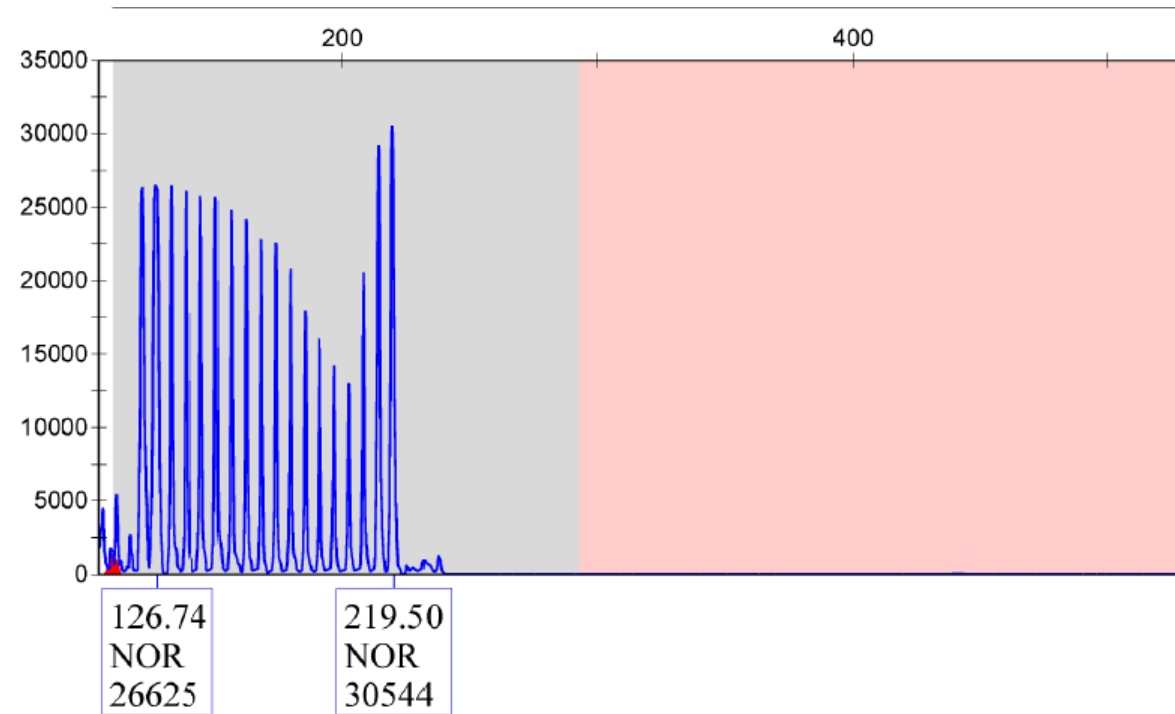

Repeat length 2 and 17, confirmed by Asuragen

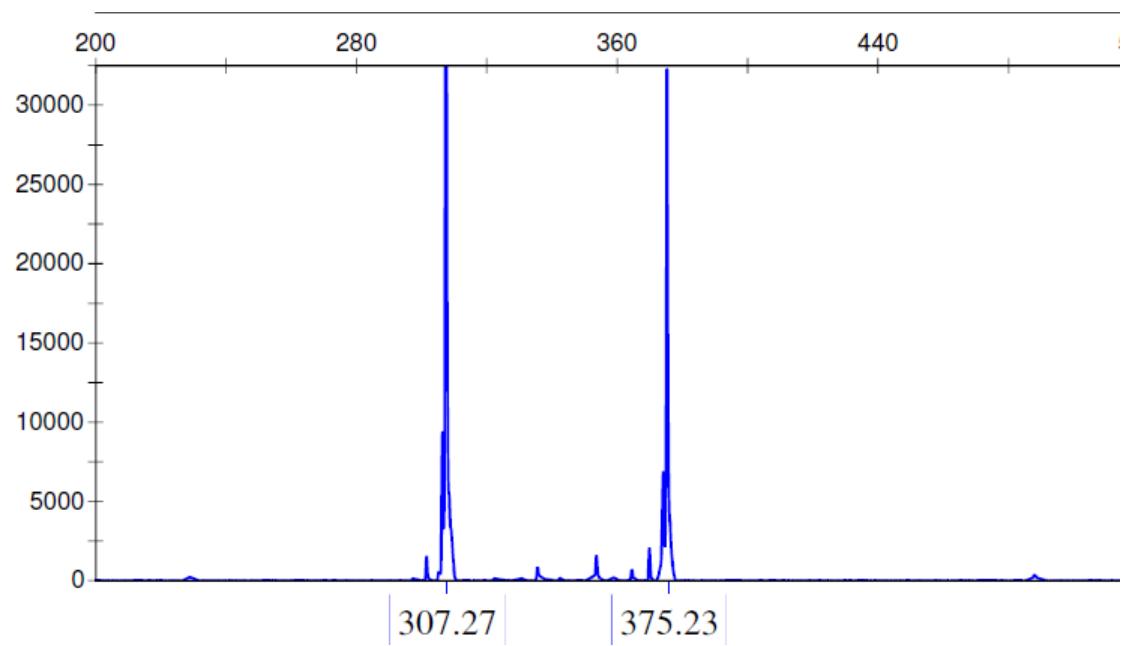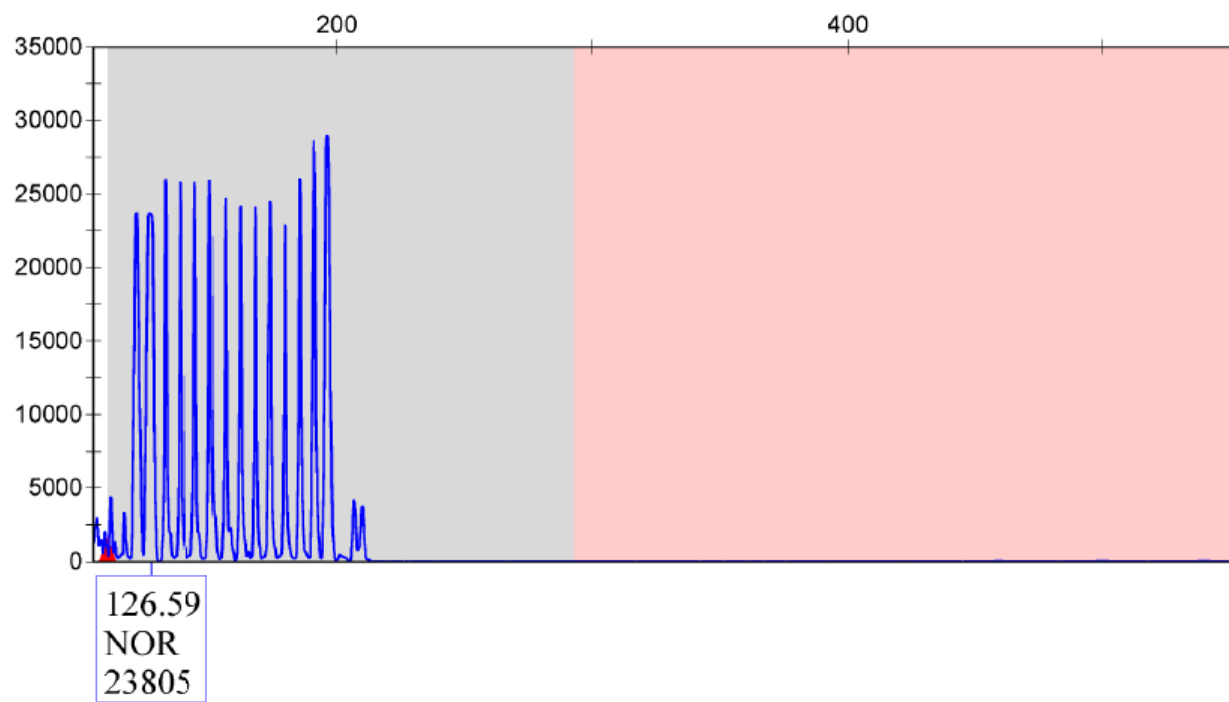

+

Repeat length 2 and 14, confirmed by Asuragen
